# Supplementary material for: The analysis of active compounds in Flos Chrysanthemi Indici by UHPLC Q exactive HF hybrid Quadrupole-Orbitrap MS and comprehensive quality assessment of its preparation
Source: Royal Society of Chemistry journal article supplement (doi:10.1039/d0fo03053h), 2021-01-01
Supplement: d0fo03053h1.pdf [file d0fo03053h1.pdf]

Analysis of active compounds in *Flos Chrysanthemi Indici* by UHPLC Q Exactive HF Hybrid Quadrupole-Orbitrap MS and comprehensive quality assessment of its preparation

Tingting Dai, Guoxiang Sun\*

Supplementary Table S1 Information of reference standards

| Corresponding compound No. | Name                     | CAS        | Provider                                                                              |
|----------------------------|--------------------------|------------|---------------------------------------------------------------------------------------|
| 1                          | Maleic acid              | 110-16-7   | National Institute of Pharmaceutical and Biological Products Control (Beijing, China) |
| 2                          | D-(-)-Quinic acid        | 77-95-2    |                                                                                       |
| 7                          | 5-Caffeoylquinicacid     | 906-33-2   |                                                                                       |
| 9                          | Caffeic acid             | 331-39-5   |                                                                                       |
| 10                         | 4-Caffeoylquinicacid     | 905-99-7   |                                                                                       |
| 11                         | 1-Caffeoylquinicacid     | 1241-87-8  |                                                                                       |
| 12                         | 7-Hydroxycoumarine       | 93-35-6    |                                                                                       |
| 13                         | Clonidine hydrochloride  | 4205-91-8  | Chengdu Puri France Science and Technology Development Co., Ltd. (Chengdu, China)     |
| 14                         | Chlorogenic acid         | 327-97-9   | Shanghai Zheyuan Biotech Co., Ltd.                                                    |
| 15                         | Hydrochlorothiazide      | 58-93-5    |                                                                                       |
| 16                         | D-(+)-Camphor            | 464-49-3   |                                                                                       |
| 19                         | Quercetin                | 117-39-5   |                                                                                       |
| 23                         | Quercitrin               | 522-12-3   | Chengdu Puri France Science and Technology Development Co., Ltd. (Chengdu, China)     |
| 33                         | 4,5-Dicaffeoylquinicacid | 32451-88-0 |                                                                                       |
| 36                         | Rutin                    | 205-814-1  |                                                                                       |
| 38                         | Apigenin7-O-glucuronide  | 29741-09-1 |                                                                                       |
| 40                         | Glycitein                | 40957-83-3 | National Institute of Pharmaceutical and Biological Products Control (Beijing, China) |
| 49                         | Apigenin                 | 520-36-5   |                                                                                       |
| 51                         | Linarin                  | 480-36-4   |                                                                                       |
| 56                         | 3,4-Dicaffeoylquinicacid | 14534-61-3 | Chengdu Puri France Science and Technology Development Co., Ltd. (Chengdu, China)     |
| 57                         | Chrysin                  | 480-40-0   |                                                                                       |
| 60                         | 3,5-Dicaffeoylquinicacid | 2450-53-5  |                                                                                       |
| 61                         | Luteolin                 | 491-70-3   | Shanghai Zheyuan Biotech Co., Ltd.                                                    |
| 66                         | Handelin                 | 62687-22-3 |                                                                                       |

Supplementary Table S2 Quality level of SQFM

| Quality       | 1      | 2      | 3      | 4      | 5        | 6      | 7         | 8        |
|---------------|--------|--------|--------|--------|----------|--------|-----------|----------|
| Grade         | best   | better | good   | fine   | moderate | common | defective | inferior |
| $S_m \geq$    | 0.95   | 0.9    | 0.85   | 0.8    | 0.7      | 0.6    | 0.5       | <0.50    |
| $P_m \leq$    | 95~105 | 90~110 | 85~115 | 80~120 | 70~130   | 60~140 | 50~150    | 0~∞      |
| $\alpha \leq$ | 0.05   | 0.1    | 0.15   | 0.2    | 0.3      | 0.4    | 0.5       | >0.50    |

**Supplementary Table S3** Identification of the chemical constituents in FCI/FCIP samples by UHPLC Q Exactive HF Hybrid Quadrupole-Orbitrap MS

| No.             | RT (min) | Identification                           | Formula                                                                      | Ion adduction      | Experimental (m/z) | Theoretical (m/z) | Error (ppm) | Fragments (m/z)                                 | Source   |
|-----------------|----------|------------------------------------------|------------------------------------------------------------------------------|--------------------|--------------------|-------------------|-------------|-------------------------------------------------|----------|
| 1 <sup>a</sup>  | 0.61     | Maleic acid                              | C <sub>4</sub> H <sub>4</sub> O <sub>5</sub>                                 | [M-H] <sup>-</sup> | 133.0136           | 133.0134          | 1.5         | 115.0145                                        | FCI      |
| 2 <sup>a</sup>  | 0.81     | D-(-)-Quinic acid                        | C <sub>7</sub> H <sub>12</sub> O <sub>6</sub>                                | [M-H] <sup>-</sup> | 191.0634           | 191.0635          | -0.5        | 173.0098, 127.0423                              | FCI      |
| 3               | 0.90     | D-(+)-Proline                            | C <sub>5</sub> H <sub>9</sub> NO <sub>2</sub>                                | [M+H] <sup>+</sup> | 116.0633           | 116.0633          | 0.0         | 71.0657                                         | FCI/FCIP |
| 4               | 0.95     | L-Pyroglutamic acid                      | C <sub>5</sub> H <sub>7</sub> NO <sub>3</sub>                                | [M+H] <sup>+</sup> | 130.0499           | 130.0498          | 0.8         | 84.0449, 60.0563                                | FCI/FCIP |
| 5               | 1.20     | N-Acetyl-L-glutamate                     | C <sub>7</sub> H <sub>11</sub> NO <sub>5</sub>                               | [M+H] <sup>+</sup> | 190.0708           | 190.0706          | 1.1         | 167.5064, 148.0603, 144.0653, 130.0499          | FCI/FCIP |
| 6               | 1.40     | Prolylleucine                            | C <sub>11</sub> H <sub>20</sub> N <sub>2</sub> O <sub>3</sub>                | [M+H] <sup>+</sup> | 229.1544           | 229.1547          | -1.3        | 184.0214, 142.0862                              | FCI/FCIP |
| 7 <sup>a</sup>  | 1.84     | 5-Caffeoylquinic acid                    | C <sub>16</sub> H <sub>17</sub> O <sub>9</sub>                               | [M-H] <sup>-</sup> | 353.0873           | 353.0872          | 0.3         | 191.0377, 179.0178, 173.0964                    | FCI      |
| 8               | 2.26     | L-Phenylalanine                          | C <sub>9</sub> H <sub>11</sub> NO <sub>2</sub>                               | [M+H] <sup>+</sup> | 166.0861           | 166.0860          | 0.6         | 120.0808, 93.0422, 73.0611                      | FCI/FCIP |
| 9 <sup>a</sup>  | 3.54     | Caffeic acid                             | C <sub>9</sub> H <sub>7</sub> O <sub>4</sub>                                 | [M-H] <sup>-</sup> | 179.0344           | 179.0343          | 0.6         | 135.0073                                        | FCI/FCIP |
| 10 <sup>a</sup> | 4.31     | 4-Caffeoylquinic acid                    | C <sub>16</sub> H <sub>17</sub> O <sub>9</sub>                               | [M-H] <sup>-</sup> | 353.0873           | 353.0863          | 2.8         | 191.1047, 179.0982, 173.0446, 135.0874          | FCI      |
| 11 <sup>a</sup> | 4.43     | 1-Caffeoylquinic acid                    | C <sub>16</sub> H <sub>18</sub> O <sub>9</sub>                               | [M-H] <sup>-</sup> | 353.0951           | 353.0945          | 1.7         | 191.0418, 179.0014, 173.0354, 135.0097          | FCI      |
| 12 <sup>a</sup> | 4.51     | 7-Hydroxycoumarin                        | C <sub>9</sub> H <sub>6</sub> O <sub>3</sub>                                 | [M+H] <sup>+</sup> | 163.0318           | 163.0317          | 0.6         | 133.0433, 105.1103                              | FCI/FCIP |
| 13 <sup>a</sup> | 4.58     | Clonidine                                | C <sub>9</sub> H <sub>9</sub> Cl <sub>2</sub> N <sub>3</sub>                 | [M-H] <sup>-</sup> | 228.0174           | 228.0172          | 0.9         | -                                               | FCIP     |
| 14 <sup>a</sup> | 5.25     | Chlorogenic acid                         | C <sub>16</sub> H <sub>18</sub> O <sub>9</sub>                               | [M-H] <sup>-</sup> | 353.0951           | 353.0949          | 0.6         | 191.0556, 179.0614, 173.0031, 135.0715          | FCI/FCIP |
| 15 <sup>a</sup> | 5.42     | Hydrochlorothiazide                      | C <sub>7</sub> H <sub>8</sub> ClN <sub>3</sub> O <sub>4</sub> S <sub>2</sub> | [M-H] <sup>-</sup> | 296.0014           | 296.0012          | 0.7         | 217.0041, 205.0314                              | FCIP     |
| 16 <sup>a</sup> | 6.09     | D-(+)-Camphor                            | C <sub>10</sub> H <sub>16</sub> O                                            | [M-H] <sup>-</sup> | 151.1201           | 151.1200          | 0.7         | 136.0845                                        | FCI/FCIP |
| 17              | 6.12     | 6,7-Dihydroxy-4-methylcoumarin           | C <sub>10</sub> H <sub>8</sub> O <sub>4</sub>                                | [M+H] <sup>+</sup> | 193.0493           | 193.0493          | 0.0         | 165.0545, 147.0803, 133.0647, 105.0701, 77.0452 | FCI/FCIP |
| 18              | 6.18     | Cyclo (leucylprolyl)                     | C <sub>11</sub> H <sub>18</sub> N <sub>2</sub> O <sub>2</sub>                | [M+H] <sup>+</sup> | 211.1439           | 211.1436          | 1.4         | 206.0321, 183.1491, 86.0969                     | FCI/FCIP |
| 19 <sup>a</sup> | 6.23     | Quercetin                                | C <sub>15</sub> H <sub>10</sub> O <sub>7</sub>                               | [M-H] <sup>-</sup> | 301.0427           | 301.0425          | 0.7         | 284.0969, 191.0077, 151.0621, 109.0675          | FCI/FCIP |
| 20              | 6.31     | Luteolin-7-O-glucuronide                 | C <sub>21</sub> H <sub>17</sub> O <sub>12</sub>                              | [M-H] <sup>-</sup> | 461.0012           | 461.0002          | 2.2         | 285.0659, 175.1126                              | FCI/FCIP |
| 21              | 6.49     | Quercetin-3β-D-glucoside                 | C <sub>21</sub> H <sub>20</sub> O <sub>12</sub>                              | [M-H] <sup>-</sup> | 463.0955           | 463.0953          | 0.4         | 301.0474, 273.3101, 191.03858                   | FCI/FCIP |
| 22              | 6.52     | Kaempferol-7-O-glucoside                 | C <sub>21</sub> H <sub>20</sub> O <sub>11</sub>                              | [M-H] <sup>-</sup> | 447.1006           | 447.1002          | 0.9         | 285.0038, 191.0257                              | FCI      |
| 23 <sup>a</sup> | 6.59     | Quercitrin                               | C <sub>21</sub> H <sub>20</sub> O <sub>11</sub>                              | [M-H] <sup>-</sup> | 447.1006           | 447.1004          | 0.4         | 301.0103, 272.0321, 167.01329                   | FCI/FCIP |
| 24              | 6.64     | Quercetin-3-O-glucuronide-7-O-glucoside  | C <sub>29</sub> H <sub>51</sub> O <sub>15</sub>                              | [M-H] <sup>-</sup> | 639.0429           | 639.0421          | 1.3         | 477.1661, 463.0122, 301.0121                    | FCI/FCIP |
| 25              | 6.77     | Kaempferol-3-O-rutinoside-7-O-rhamnoside | C <sub>33</sub> H <sub>39</sub> O <sub>19</sub>                              | [M-H] <sup>-</sup> | 739.1041           | 739.1016          | 3.4         | 593.1302, 431.1028, 285.0436,                   | FCI/FCIP |
| 26              | 6.84     | 5,7,2'-Trihydroxyflavone-7-glucuronide   | C <sub>21</sub> H <sub>18</sub> O <sub>11</sub>                              | [M-H] <sup>-</sup> | 445.0849           | 445.0846          | 0.7         | 269.0347, 152.1022                              | FCI      |
| 27              | 6.95     | 6-O-Methylscutellarin                    | C <sub>22</sub> H <sub>20</sub> O <sub>12</sub>                              | [M-H] <sup>-</sup> | 475.0955           | 475.0956          | -0.2        | 460.0055, 299.0286, 284.0849                    | FCI      |

| No.             | RT (min) | Identification                  | Formula                                         | Ion adduction      | Experimental (m/z) | Theoretical (m/z) | Error (ppm) | Fragments (m/z)                                            | Source   |
|-----------------|----------|---------------------------------|-------------------------------------------------|--------------------|--------------------|-------------------|-------------|------------------------------------------------------------|----------|
| 28              | 7.01     | Nictoflorin                     | C <sub>27</sub> H <sub>30</sub> O <sub>15</sub> | [M-H] <sup>-</sup> | 593.1585           | 593.1605          | -3.4        | 285.0368, 284.1021, 266.0121                               | FCI/FCIP |
| 29              | 7.08     | Luteolin-7-O-β-D-glucoside      | C <sub>21</sub> H <sub>19</sub> O <sub>11</sub> | [M-H] <sup>-</sup> | 447.1020           | 447.1021          | -0.2        | 285.0674, 175.0544, 152.0178, 134.2101                     | FCI/FCIP |
| 30              | 7.18     | Baicalin                        | C <sub>21</sub> H <sub>18</sub> O <sub>11</sub> | [M-H] <sup>-</sup> | 445.0849           | 445.0861          | -2.7        | 269.0547, 192.1201, 167.3107                               | FCI      |
| 31              | 7.23     | Scutellarin                     | C <sub>21</sub> H <sub>18</sub> O <sub>12</sub> | [M-H] <sup>-</sup> | 461.0798           | 461.0801          | -0.7        | 285.0398, 257.0143, 192.0352                               | FCI      |
| 32              | 7.46     | Luteolin-7-O-rutinoside         | C <sub>27</sub> H <sub>29</sub> O <sub>15</sub> | [M-H] <sup>-</sup> | 593.1045           | 593.1056          | -1.9        | 285.1024, 257.0386, 151.0343                               | FCI/FCIP |
| 33 <sup>a</sup> | 7.69     | 4,5-Dicaffeoylquinicacid        | C <sub>25</sub> H <sub>24</sub> O <sub>12</sub> | [M-H] <sup>-</sup> | 515.1268           | 515.1267          | 0.2         | 353.0124, 191.0365, 179.0406, 173.0108, 135.0741           | FCI/FCIP |
| 34              | 7.88     | Neodiosmin                      | C <sub>28</sub> H <sub>32</sub> O <sub>15</sub> | [M-H] <sup>-</sup> | 607.1741           | 607.1739          | 0.3         | 592.1179, 460.1214, 299.0716                               | FCI/FCIP |
| 35              | 8.01     | Esculetin                       | C <sub>9</sub> H <sub>6</sub> O <sub>4</sub>    | [M+H] <sup>+</sup> | 179.0266           | 179.0266          | 0.0         | 151.0327, 133.0689, 105.0986                               | FCI/FCIP |
| 36 <sup>a</sup> | 8.26     | Rutin                           | C <sub>27</sub> H <sub>30</sub> O <sub>16</sub> | [M-H] <sup>-</sup> | 609.1534           | 609.1541          | -1.1        | 301.0144, 300.0106, 167.0124                               | FCI/FCIP |
| 37              | 8.55     | Apigenin7-(6-methylglucuronide) | C <sub>22</sub> H <sub>20</sub> O <sub>11</sub> | [M-H] <sup>-</sup> | 459.1006           | 459.1001          | 1.1         | 270.0582, 177.0257, 153.6568                               | FCI/FCIP |
| 38 <sup>a</sup> | 8.98     | Apigenin7-O-glucuronide         | C <sub>21</sub> H <sub>18</sub> O <sub>11</sub> | [M-H] <sup>-</sup> | 445.0849           | 445.0858          | -2.0        | 269.0203, 241.3189, 175.0694, 150.0659                     | FCI      |
| 39              | 9.35     | Genistin                        | C <sub>21</sub> H <sub>20</sub> O <sub>10</sub> | [M-H] <sup>-</sup> | 431.1057           | 431.1056          | 0.2         | 269.0475, 175.0658                                         | FCI      |
| 40 <sup>a</sup> | 9.89     | Glycitein                       | C <sub>16</sub> H <sub>12</sub> O <sub>5</sub>  | [M-H] <sup>-</sup> | 283.0685           | 283.0680          | 1.8         | 268.0415, 251.0112, 189.0177, 145.0641                     | FCI      |
| 41              | 10.21    | Apigetrin                       | C <sub>21</sub> H <sub>20</sub> O <sub>10</sub> | [M-H] <sup>-</sup> | 431.1057           | 431.1046          | 2.6         | 269.0145, 175.1254, 151.0141                               | FCI/FCIP |
| 42              | 10.45    | Maritimein                      | C <sub>21</sub> H <sub>20</sub> O <sub>11</sub> | [M-H] <sup>-</sup> | 448.1006           | 448.1002          | 0.9         | 286.0426, 177.0423                                         | FCI/FCIP |
| 43              | 10.69    | Demethyltexasin                 | C <sub>15</sub> H <sub>10</sub> O <sub>5</sub>  | [M-H] <sup>-</sup> | 269.0143           | 269.0139          | 1.5         | 241.0684, 176.1645, 152.0688, 117.0882                     | FCI      |
| 44              | 11.65    | Maritimetin                     | C <sub>15</sub> H <sub>10</sub> O <sub>6</sub>  | [M-H] <sup>-</sup> | 285.0477           | 285.0467          | 3.5         | 268.0215, 251.0121, 213.0506, 175.2144                     | FCI/FCIP |
| 45              | 11.87    | Kaempferol                      | C <sub>15</sub> H <sub>10</sub> O <sub>6</sub>  | [M-H] <sup>-</sup> | 285.0473           | 285.0478          | -1.8        | 257.0132, 151.0081, 191.0633, 133.0966                     | FCI/FCIP |
| 46              | 12.36    | Daidzein                        | C <sub>15</sub> H <sub>10</sub> O <sub>4</sub>  | [M-H] <sup>-</sup> | 253.0156           | 253.0150          | 2.4         | 160.0188, 136.0504, 117.1009                               | FCI      |
| 47              | 12.58    | Tricin5-O-β-D-glucoside         | C <sub>23</sub> H <sub>24</sub> O <sub>12</sub> | [M-H] <sup>-</sup> | 491.1268           | 491.1262          | 1.2         | 329.0335, 314.0857, 299.0411                               | FCI      |
| 48              | 12.86    | BiochaninA                      | C <sub>16</sub> H <sub>12</sub> O <sub>5</sub>  | [M-H] <sup>-</sup> | 283.0685           | 283.0694          | -3.2        | 268.0034, 175.0636, 151.3637, 131.0744                     | FCI      |
| 49 <sup>a</sup> | 13.64    | Apigenin                        | C <sub>15</sub> H <sub>10</sub> O <sub>5</sub>  | [M-H] <sup>-</sup> | 269.0524           | 269.0522          | 0.7         | 251.0301, 175.0126, 151.1037, 117.0435, 93.0058            | FCI/FCIP |
| 50              | 13.89    | Diosmetin-7-O-rutinoside        | C <sub>28</sub> H <sub>31</sub> O <sub>15</sub> | [M-H] <sup>-</sup> | 607.0614           | 607.0628          | -2.3        | 592.1501, 445.1201, 299.1021,                              | FCI/FCIP |
| 51 <sup>a</sup> | 14.02    | Linarin                         | C <sub>28</sub> H <sub>32</sub> O <sub>14</sub> | [M-H] <sup>-</sup> | 591.1893           | 591.1880          | 2.2         | 576.0187, 445.0024, 283.0719, 268.0146, 151.1057, 131.0239 | FCI/FCIP |
| 52              | 14.21    | Isorhamnetin                    | C <sub>16</sub> H <sub>12</sub> O <sub>7</sub>  | [M-H] <sup>-</sup> | 315.0578           | 315.0585          | -2.2        | 300.0108, 287.0044, 272.0764, 151.0641                     | FCI      |
| 53              | 14.38    | Sulfuretin                      | C <sub>15</sub> H <sub>10</sub> O <sub>5</sub>  | [M-H] <sup>-</sup> | 269.0528           | 269.0521          | 2.6         | 252.0324, 213.0960, 159.0645                               | FCI      |
| 54              | 14.86    | 5,7,8-Trihydroxyflavone         | C <sub>15</sub> H <sub>10</sub> O <sub>5</sub>  | [M-H] <sup>-</sup> | 269.0524           | 269.0521          | 1.1         | 192.0323, 167.0021, 101.0319, 76.0021                      | FCI/FCIP |
| 55              | 15.04    | Formononetin                    | C <sub>16</sub> H <sub>12</sub> O <sub>4</sub>  | [M-H] <sup>-</sup> | 267.0736           | 267.0735          | 0.4         | 252.0108, 235.0641, 223.0507, 159.0062, 135.0674           | FCI/FCIP |

| No.             | RT (min) | Identification                              | Formula                                         | Ion adduction             | Experimental (m/z) | Theoretical (m/z) | Error (ppm) | Fragments (m/z)                                            | Source   |
|-----------------|----------|---------------------------------------------|-------------------------------------------------|---------------------------|--------------------|-------------------|-------------|------------------------------------------------------------|----------|
| 56 <sup>a</sup> | 15.29    | 3,4-Dicaffeoylquinicacid                    | C <sub>25</sub> H <sub>23</sub> O <sub>12</sub> | [M-H] <sup>-</sup>        | 515.1087           | 515.1103          | -3.1        | 353.0614, 191.2413, 179.0021, 173.0175, 161.0206, 135.0651 | FCI/FCIP |
| 57 <sup>a</sup> | 15.31    | Chrysin                                     | C <sub>15</sub> H <sub>10</sub> O <sub>4</sub>  | [M-H] <sup>-</sup>        | 253.0579           | 253.0578          | 0.4         | 151.0243, 101.0031, 176.0548, 76.0319                      | FCI/FCIP |
| 58              | 15.76    | 5-O-Methylgenistein                         | C <sub>16</sub> H <sub>12</sub> O <sub>5</sub>  | [M-H] <sup>-</sup>        | 283.0685           | 283.0682          | 1.1         | 268.0314, 189.3304, 166.0877                               | FCI/FCIP |
| 59              | 16.01    | 5,4'-Dihydroxy-7-methoxyflavone             | C <sub>16</sub> H <sub>11</sub> O <sub>5</sub>  | [M-H] <sup>-</sup>        | 283.0912           | 283.0914          | -0.7        | 268.0473, 189.0457, 165.0511, 117.0098, 93.0822            | FCI      |
| 60 <sup>a</sup> | 16.24    | 3,5-Dicaffeoylquinicacid                    | C <sub>25</sub> H <sub>24</sub> O <sub>12</sub> | [M-H] <sup>-</sup>        | 515.1268           | 515.1254          | 2.7         | 353.0987, 191.0132, 179.1874, 173.0187                     | FCI      |
| 61 <sup>a</sup> | 16.54    | Luteolin                                    | C <sub>15</sub> H <sub>9</sub> O <sub>6</sub>   | [M-H] <sup>-</sup>        | 285.0512           | 285.0506          | 2.1         | 257.0106, 199.0137, 175.0188, 151.0108, 133.0289, 109.0956 | FCI/FCIP |
| 62              | 16.79    | Eupatolitin                                 | C <sub>17</sub> H <sub>13</sub> O <sub>8</sub>  | [M-H] <sup>-</sup>        | 345.0109           | 345.0098          | 3.2         | 330.0305, 315.0339, 235.0644, 195.0647                     | FCI      |
| 63              | 17.01    | 5,2'-Dihydroxy-6,7,8,6'-tetramethoxyflavone | C <sub>19</sub> H <sub>18</sub> O <sub>8</sub>  | [M-H] <sup>-</sup>        | 373.0994           | 373.0991          | 0.8         | 358.0301, 343.0494, 328.0511, 249.0119, 123.1306           | FCI      |
| 64              | 17.31    | Chrysoeriol                                 | C <sub>16</sub> H <sub>11</sub> O <sub>6</sub>  | [M-H] <sup>-</sup>        | 299.0812           | 299.0806          | 2.0         | 284.0039, 175.0058, 150.0066, 148.0614                     | FCI/FCIP |
| 65              | 17.66    | Jaceosidin                                  | C <sub>17</sub> H <sub>13</sub> O <sub>7</sub>  | [M-H] <sup>-</sup>        | 329.0745           | 329.0745          | 0.1         | 314.0169, 299.0078, 180.0069, 148.0582                     | FCI      |
| 66 <sup>a</sup> | 18.01    | Handelin                                    | C <sub>32</sub> H <sub>39</sub> O <sub>8</sub>  | [M+HC OOH+H] <sup>+</sup> | 597.2706           | 597.2692          | 2.3         | -                                                          | FCI      |

**Supplementary Table S4** Linear regression equations, LOD, LOQ and linear range for quantitative analysis by HPLC.

| Analyte                      | Regression equation    | R <sup>2</sup> | Linear range<br>(µg/mL) | Precision <sup>a</sup><br>(RSD%) | Repeatability <sup>b</sup><br>(RSD%) | Recovery<br>(%) | LOD<br>(ng) | LOQ<br>(ng) |
|------------------------------|------------------------|----------------|-------------------------|----------------------------------|--------------------------------------|-----------------|-------------|-------------|
| Hydrochlorothiazide (Peak 6) | $y = 7.1372x - 7.71$   | 0.9998         | 23.8-713.2              | 1.01                             | 1.36                                 | 98.70%          | 0.523       | 1.264       |
| Chlorogenic acid (Peak 8)    | $y = 14.65x - 0.7567$  | 0.9998         | 0.7-21.0                | 1.37                             | 1.63                                 | 97.10%          | 0.129       | 0.414       |
| Rutin (Peak 16)              | $y = 1.8344x - 5.5383$ | 1.0000         | 83.7-2512.0             | 0.87                             | 1.48                                 | 99.10%          | 1.012       | 4.256       |
| Linarin (Peak 23)            | $y = 18.05x - 9.6231$  | 0.9999         | 3.3-100.0               | 1.64                             | 1.87                                 | 97.30%          | 0.151       | 0.383       |

<sup>a,b</sup> Precision and repeatability of the quantitative method were expressed as the RSD of the peak areas of 6 injections of each analyte.

**Supplementary Table S5** Weighting factor of three parameters by CVWM algorithm for three types of fingerprints

| Para. | Fusion HPLC-FP |              |                  | UV-FP      |            |                | DSC-FP      |             |                 |
|-------|----------------|--------------|------------------|------------|------------|----------------|-------------|-------------|-----------------|
|       | $S_{m-HPLC}$   | $P_{m-HPLC}$ | $\alpha_{-HPLC}$ | $S_{m-UV}$ | $P_{m-UV}$ | $\alpha_{-UV}$ | $S_{m-DSC}$ | $P_{m-DSC}$ | $\alpha_{-DSC}$ |
| Mean  | 0.956          | 97.2         | 0.047            | 0.998      | 95.5       | 0.017          | 0.957       | 98.4        | 0.042           |
| SD    | 0.027          | 12.205       | 0.030            | 0.001      | 9.263      | 0.011          | 0.012       | 4.581       | 0.012           |
| CV    | 2.84           | 12.56        | 64.44            | 0.12       | 9.70       | 68.74          | 1.27        | 4.66        | 29.70           |
| $f_w$ | 0.67           | 0.47         | 0.40             | 0.03       | 0.36       | 0.42           | 0.30        | 0.17        | 0.18            |

**Supplementary Table S6** Overview of the experimental and predicted values for total antioxidant activity of ABTS test obtained by PLS model

| No.              | Experimental data ( $\mu\text{g/ml}$ ) | Predicted Data ( $\mu\text{g/ml}$ ) | RE <sup>c</sup> (%) | No.              | Experimental data ( $\mu\text{g/ml}$ ) | Predicted Data ( $\mu\text{g/ml}$ ) | RE <sup>c</sup> (%) |
|------------------|----------------------------------------|-------------------------------------|---------------------|------------------|----------------------------------------|-------------------------------------|---------------------|
| S1 <sup>a</sup>  | 56.98                                  | 58.77                               | 3.14                | S14 <sup>a</sup> | 50.69                                  | 51.33                               | 1.26                |
| S2 <sup>a</sup>  | 58.79                                  | 59.78                               | 1.68                | S15 <sup>a</sup> | 59.67                                  | 58.81                               | -1.46               |
| S3 <sup>a</sup>  | 59.65                                  | 59.40                               | -0.41               | S16 <sup>a</sup> | 64.41                                  | 64.81                               | 0.61                |
| S4 <sup>a</sup>  | 49.21                                  | 50.65                               | 2.92                | S17 <sup>b</sup> | 68.21                                  | 65.46                               | -4.03               |
| S5 <sup>a</sup>  | 71.01                                  | 71.96                               | 1.33                | S18 <sup>a</sup> | 64.07                                  | 64.11                               | 0.06                |
| S6 <sup>b</sup>  | 58.38                                  | 59.59                               | 2.07                | S19 <sup>a</sup> | 65.67                                  | 65.25                               | -0.64               |
| S7 <sup>a</sup>  | 56.71                                  | 58.59                               | 3.32                | S20 <sup>b</sup> | 69.64                                  | 67.21                               | -3.49               |
| S8 <sup>a</sup>  | 63.46                                  | 64.02                               | 0.87                | S21 <sup>b</sup> | 68.85                                  | 66.19                               | -3.86               |
| S9 <sup>a</sup>  | 62.32                                  | 61.42                               | -1.44               | S22 <sup>a</sup> | 64.49                                  | 65.14                               | 1.02                |
| S10 <sup>b</sup> | 49.45                                  | 47.89                               | -3.15               | S23 <sup>a</sup> | 72.35                                  | 70.12                               | -3.08               |
| S11 <sup>a</sup> | 51.23                                  | 48.92                               | -4.51               | S24 <sup>a</sup> | 66.87                                  | 66.42                               | -0.67               |
| S12 <sup>a</sup> | 48.57                                  | 47.82                               | -1.55               | S25 <sup>a</sup> | 63.98                                  | 63.64                               | -0.53               |
| S13 <sup>a</sup> | 53.11                                  | 54.81                               | 3.21                |                  |                                        |                                     |                     |

<sup>a</sup> Used for the calibration model.

<sup>b</sup> Used for the prediction model.

<sup>c</sup> RE: relative error.

**Supplementary Table S7** Values of Enthalpy-1 and Enthalpy-2 of DSC curve for 25 FCIP samples

| No. | Enthalpy-1 (J/g) | Enthalpy-2 (J/g) | No. | Enthalpy-1 (J/g) | Enthalpy-2 (J/g) | No. | Enthalpy-1 (J/g) | Enthalpy-2 (J/g) |
|-----|------------------|------------------|-----|------------------|------------------|-----|------------------|------------------|
| S1  | 418.90           | 2987.63          | S10 | 443.88           | 2847.16          | S19 | 285.13           | 2574.29          |
| S2  | 390.74           | 2949.38          | S11 | 383.63           | 3071.80          | S20 | 260.71           | 2252.48          |
| S3  | 316.14           | 2634.00          | S12 | 401.08           | 3035.11          | S21 | 281.62           | 2015.08          |
| S4  | 417.73           | 2892.60          | S13 | 431.50           | 3043.60          | S22 | 343.96           | 2289.46          |
| S5  | 248.43           | 2265.60          | S14 | 417.41           | 3370.48          | S23 | 240.47           | 2152.00          |
| S6  | 390.04           | 2750.97          | S15 | 326.57           | 2738.05          | S24 | 290.03           | 2222.20          |
| S7  | 402.68           | 2773.70          | S16 | 299.49           | 2244.49          | S25 | 299.93           | 2826.95          |
| S8  | 307.03           | 2648.55          | S17 | 347.28           | 2012.43          |     |                  |                  |
| S9  | 330.10           | 2740.20          | S18 | 306.07           | 2483.12          |     |                  |                  |

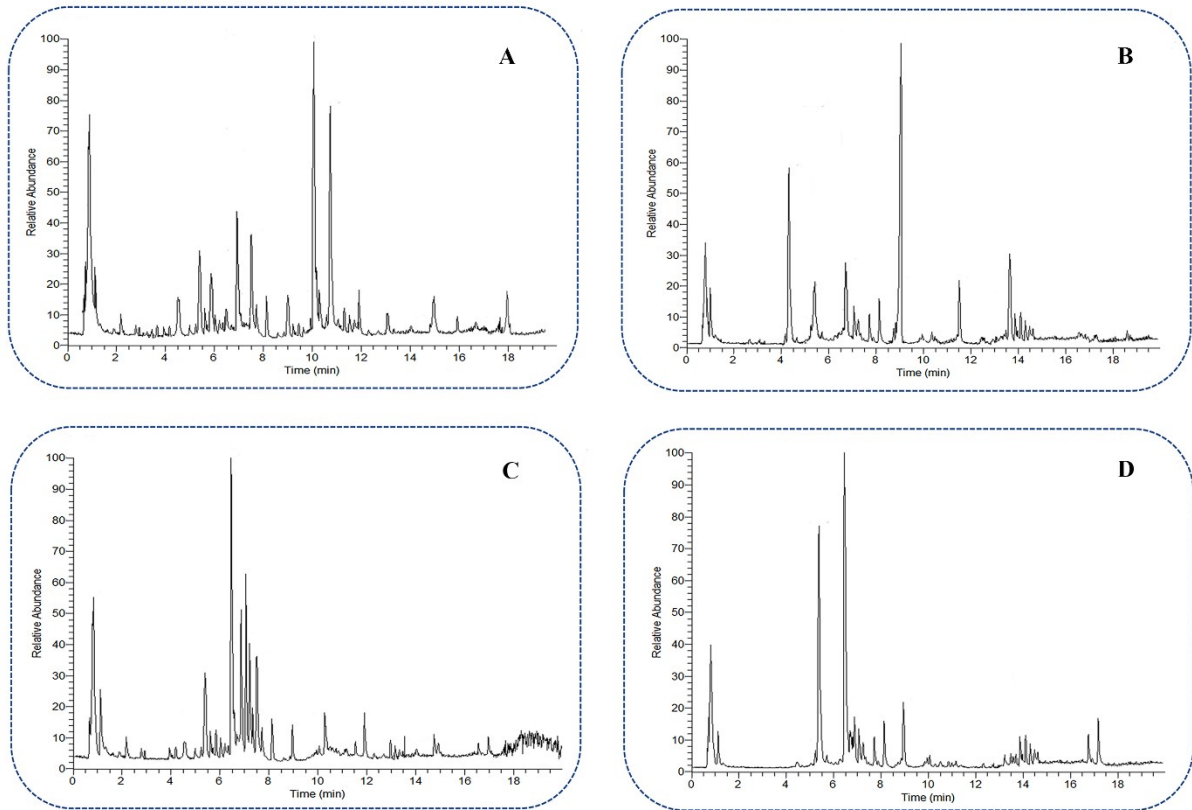

**Supplementary Fig. S1** Total ion chromatogram of FCI in negative ion mode (A), FCI in positive ion mode (B), FCIP (S1) in negative ion mode (C), FCIP (S1) in positive ion mode

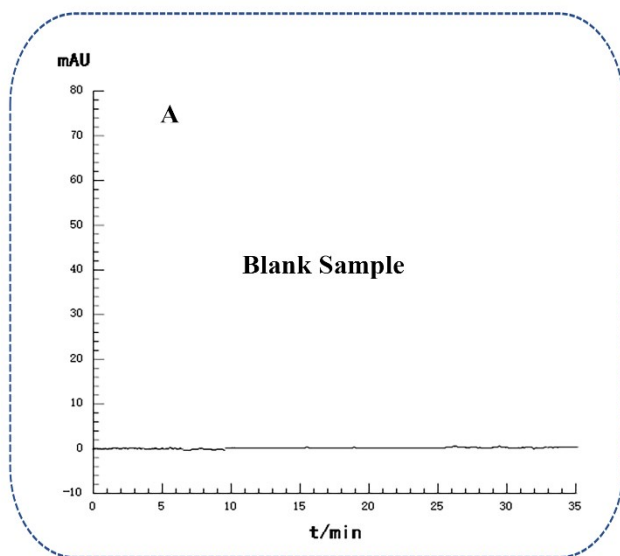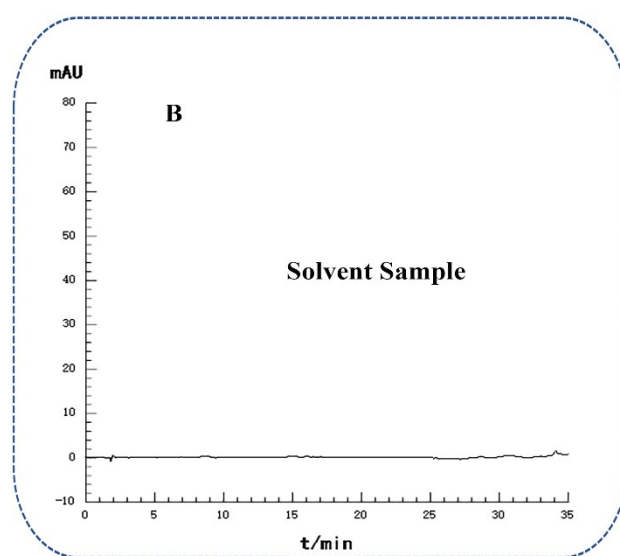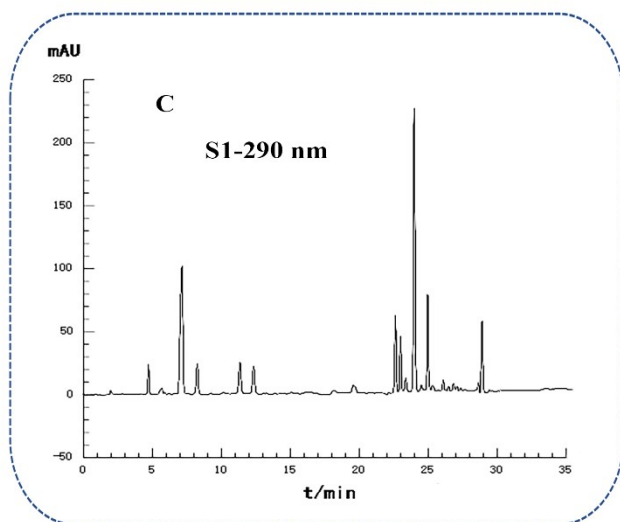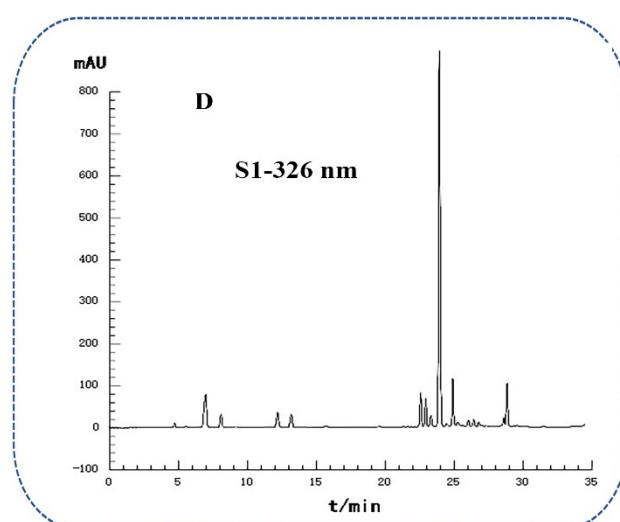

**Supplementary Fig. S2** Specificity of HPLC quantitative method. Chromatogram of blank sample (A), solvent sample (B), S1 sample at 290 nm (C), S1 sample at 326 nm (D).



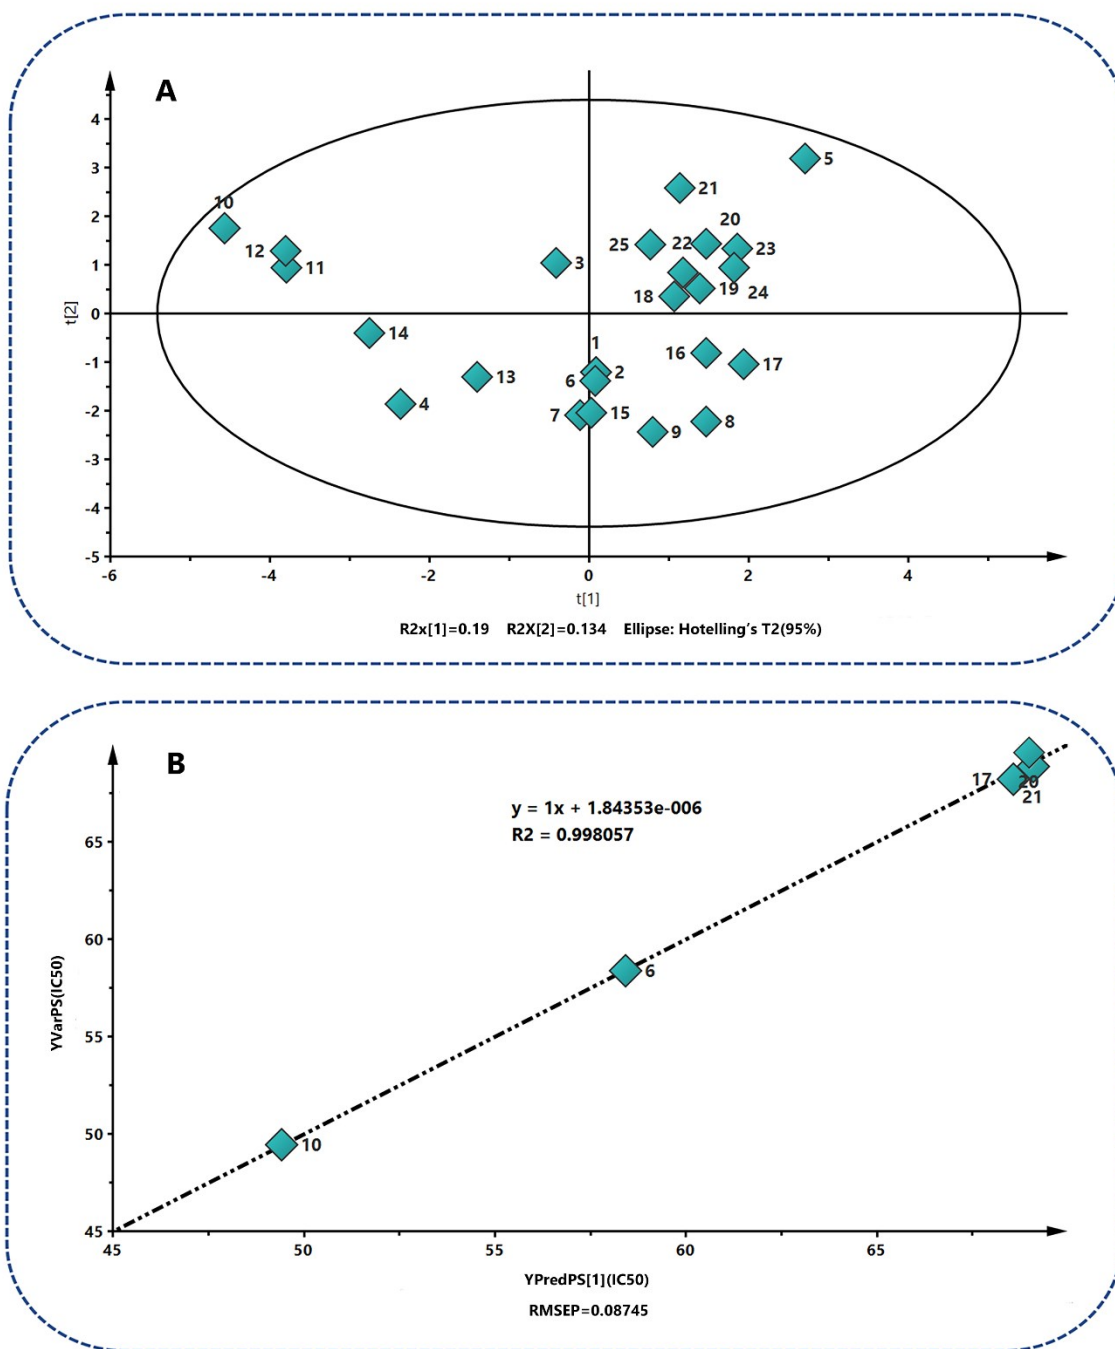

**Supplementary Fig. S3** Scores scatter plot (A) and Y observed versus Y predicted plot for the prediction model (B) of the partial least squares (PLS) model between the fusion fingerprints and the antioxidant activities
